# Supplementary material for: SWATH-MS-based quantitative proteomics reveals a uniquely intricate defense response in Cnaphalocrocis medinalis-resistant rice
Source: PubMed Central journal article supplement (PMC7406494; doi:10.1038/s41598-020-63470-1), 2020-08-05
Supplement: 41598_2020_63470_MOESM1_ESM.pdf [file 41598_2020_63470_MOESM1_ESM.pdf]

# Supplementary Figures

**SWATH-MS-based quantitative proteomics reveals a uniquely intricate defense response in *Cnaphalocrocis medinalis*-resistant rice**

Boon Huat Cheah, Hou-Ho Lin, Han-Ju Chien, Chung-Ta Liao, Li-Yu D Liu, Chien-Chen Lai, Ya-Fen Lin\*, Wen-Po Chuang\*

\*Address for correspondence: Department of Agronomy, National Taiwan University, Taipei 10617, Taiwan; yafenlin0725@ntu.edu.tw; wenpo@ntu.edu.tw

Supplementary Figure S1

**a.**

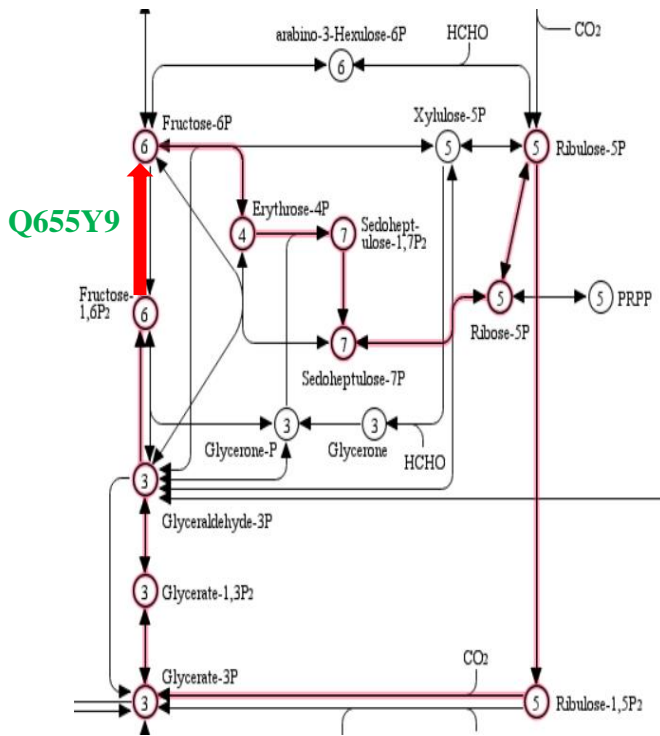

**osa00710:**

**carbon fixation in photosynthetic organisms**

**b.**

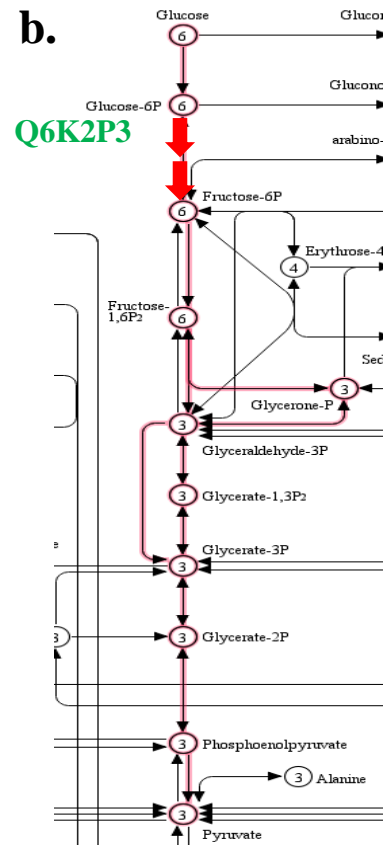

**osa00010:**

**glycolysis/gluconeogenesis**

**Supplementary Figure S1: KEGG pathway annotation of fructose 1,6-bisphosphatase (Q655Y9) and glucose-6-phosphate 1-epimerase (Q6K2P3) that were upregulated in Qingliu compared with TN1 at three time points of insect herbivory. (a) In carbon fixation process (osa00710), fructose 1,6-bisphosphatase (Q655Y9) converts fructose-1,6-bisphosphate to fructose 6-phosphate. (b) In glycolysis/gluconeogenesis (osa00010), Glucose-6-phosphate 1-epimerase (Q6K2P3) catalyses the isomerisation of alpha-D-glucose 6-phosphate to beta-D-glucose 6-phosphate which can then be converted to fructose 6-phosphate. Copyright permission was obtained for the KEGG pathway maps [49].**

## Supplementary Figure S2

### a. GO biological process enrichment for upregulated proteins at 0 h

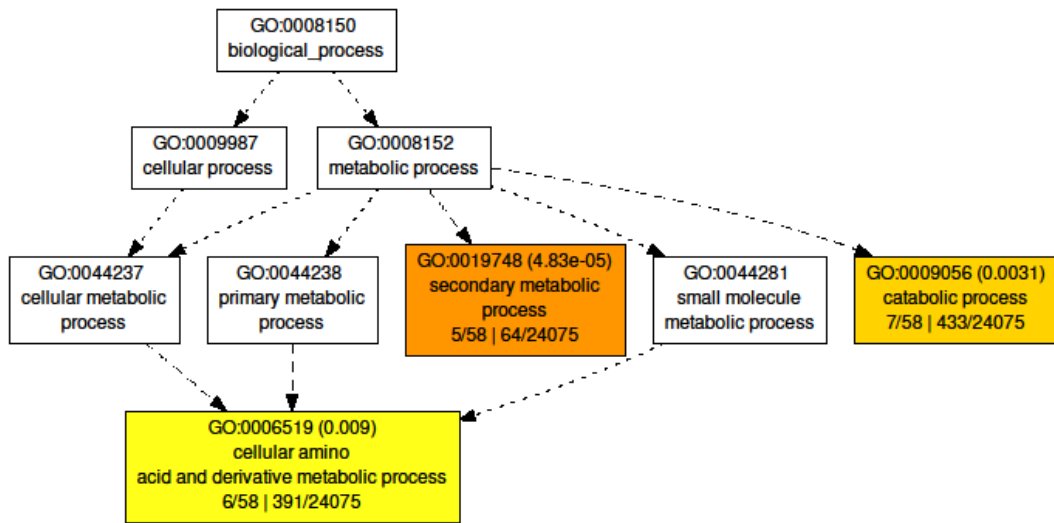

### b. GO biological process enrichment for downregulated proteins at 0 h

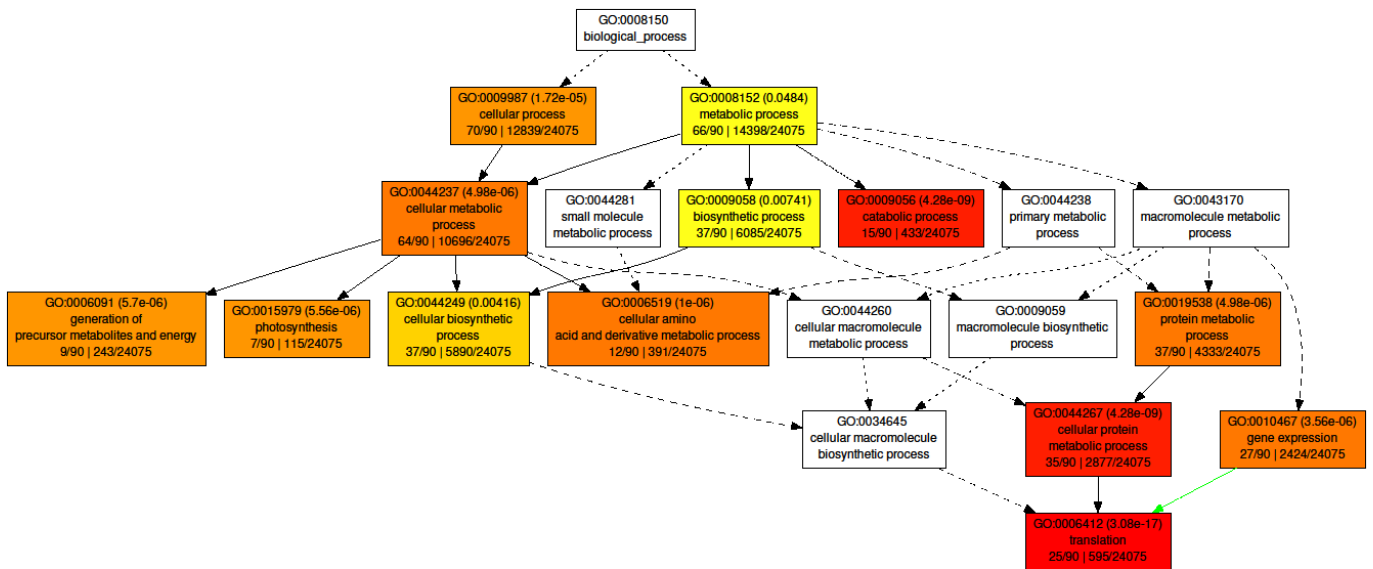

**c.** GO biological process enrichment for upregulated proteins at 6 h

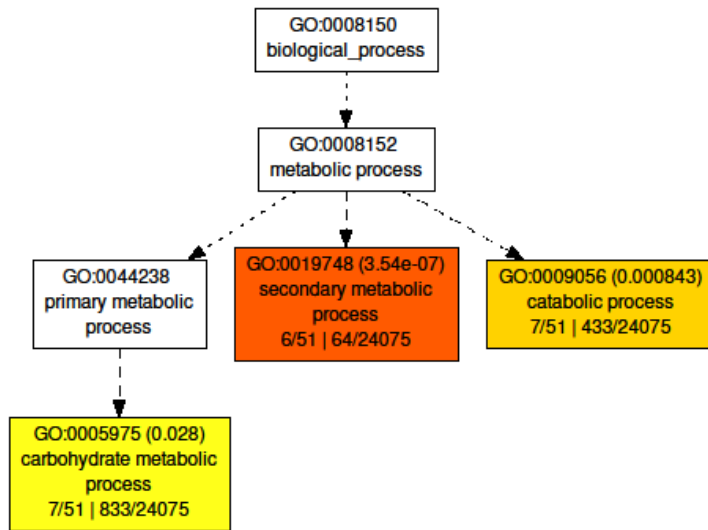

**d.** GO biological process enrichment for downregulated proteins at 6 h

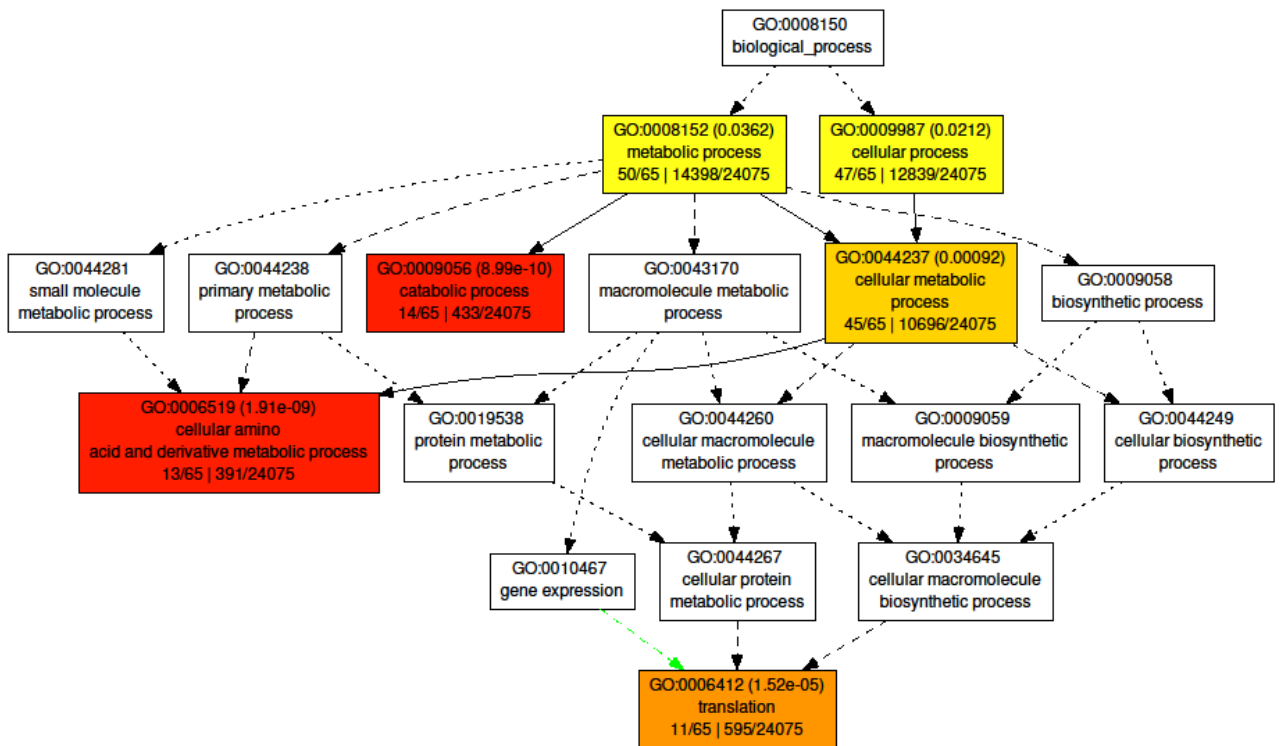

**e.** GO biological process enrichment for upregulated proteins at 24 h

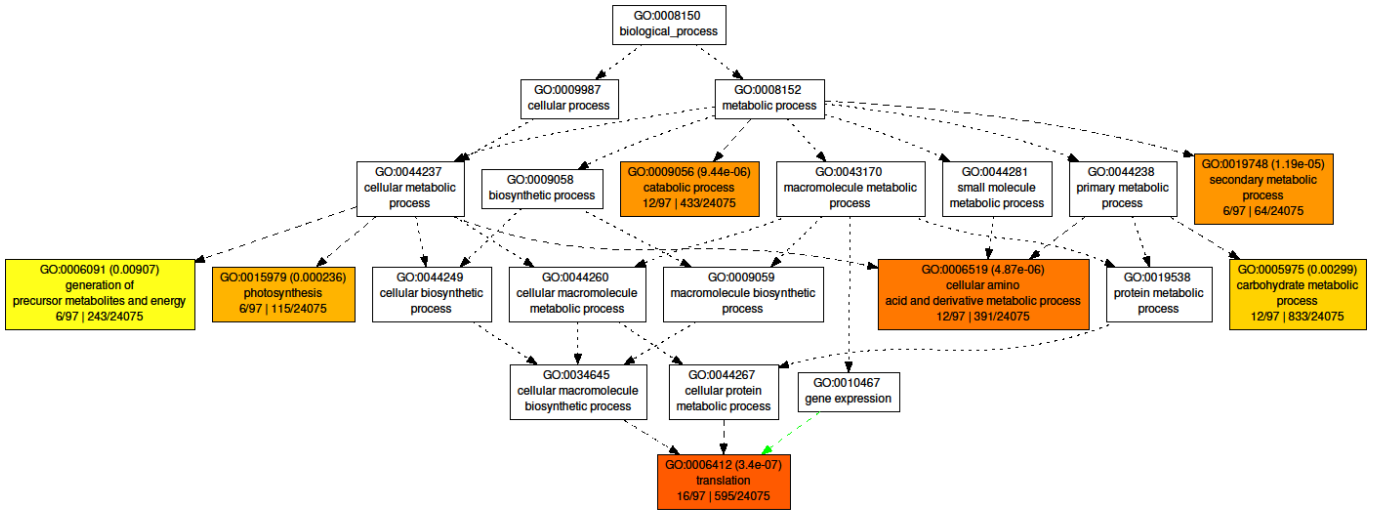

**f.** GO biological process enrichment for downregulated proteins at 24 h

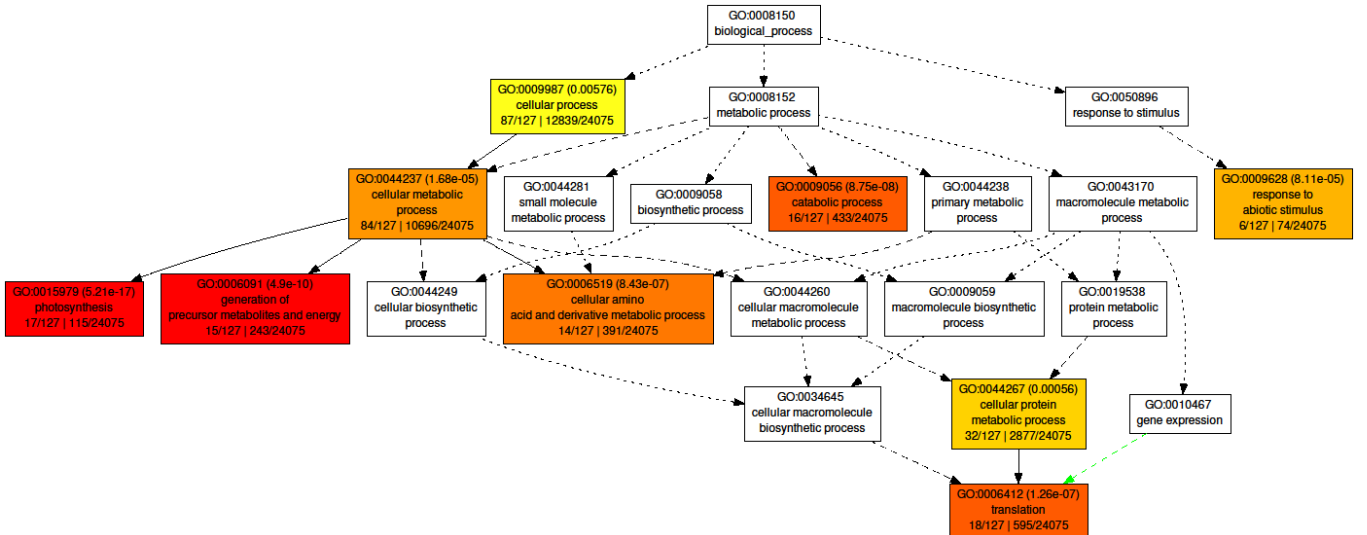

**g.** GO biological process enrichment for upregulated proteins at 72 h

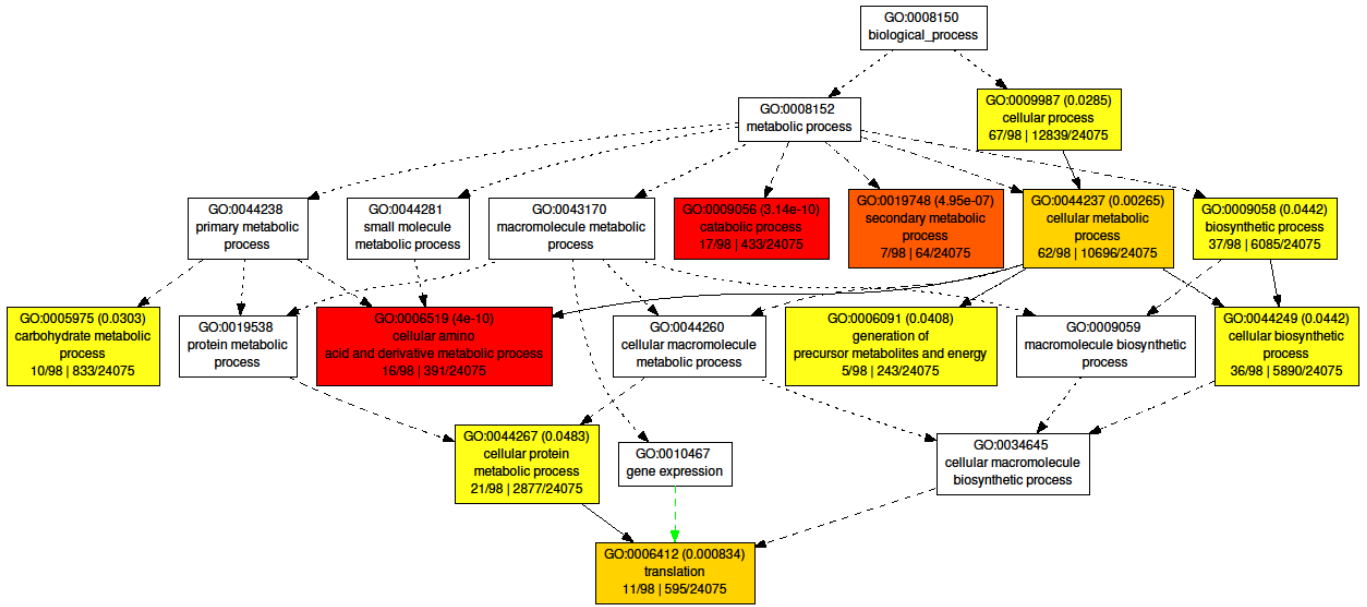

**h.** GO biological process enrichment for downregulated proteins at 72 h

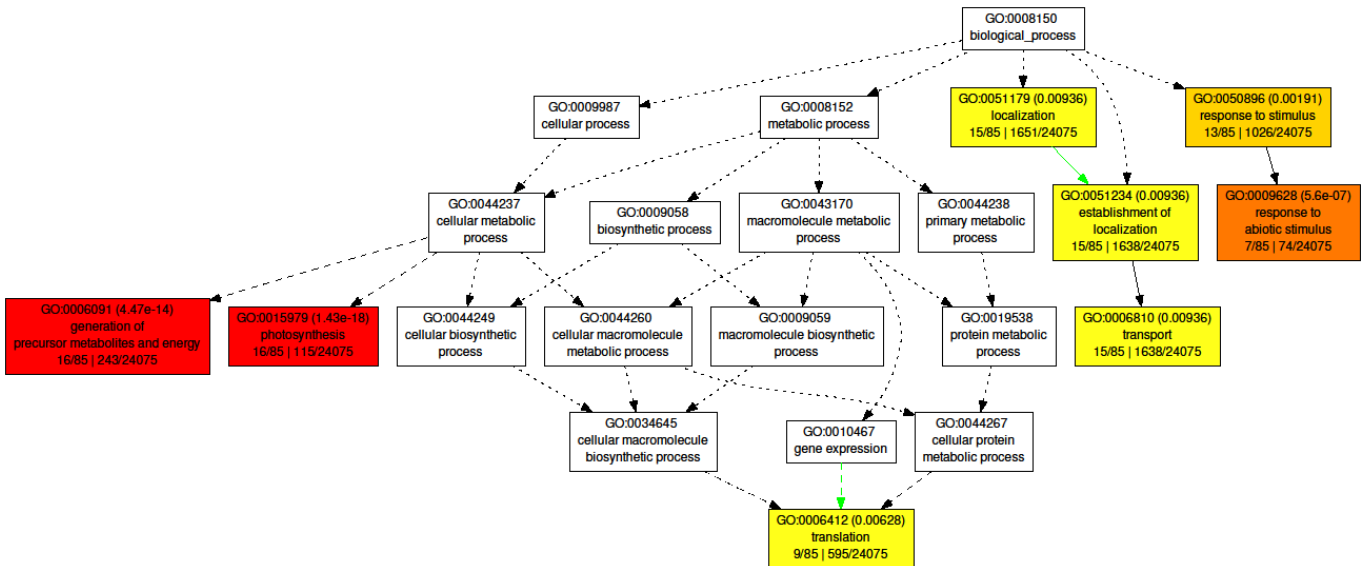

**Supplementary Figure S2: Flowcharts of the enrichment of GO biological processes for upregulated and downregulated proteins in Qingliu compared with TN1 at each time point of insect herbivory.** GO biological process enrichment (a) for upregulated proteins at 0 h, (b) for downregulated proteins at 0 h, (c) for upregulated proteins at 6 h, (d) for downregulated proteins at 6 h, (e) for upregulated proteins at 24 h, (f) for downregulated proteins at 24 h, (g) for upregulated proteins at 72 h and (h) for downregulated proteins at 72 h. The increasing significance of enrichment (adjusted p-value) is depicted in the order of yellow, orange and red boxes.
